# Supplementary material for: Competitive Repair by Naturally Dispersed Repetitive DNA during Non-Allelic Homologous Recombination
Source: PLoS Genet. 2010 Dec 2;6(12):e1001228. doi: 10.1371/journal.pgen.1001228 (PMC2996329; doi:10.1371/journal.pgen.1001228)
Supplement: Table S7 — Ranking of chromosome III RAHS recipient with all potential Ty1/Ty2 donors. (0.05 MB XLS) [file pgen.1001228.s014.xls]

## Sheet: rankSort
			OVERALL IDENTITY (%)								LONGEST BLOCK OF 100% IDENTITY (nt)										LOCAL IDENTITY (bit score)
Rank	vs YCRWTy1-2	% Identity		Rank	vs YCRWTy1-3	% Identity		Rank	vs YCRWTy1-2	Length		Rank	vs YCRWTy1-3	Length		Rank	vs YCRWTy1-2	bit score	Length	% Identity		Rank	vs YCRWTy1-3	bit score	Length	% Identity
	YCRWTy1-2	1			YCRWTy1-3	1			YCRWTy1-2	5915			YCRWTy1-3	5920			YCRWTy1-2	11730	5915	1			YCRWTy1-3	11740	5920	1
1	YDRWTy1-5	0.994		1	YJRWTy1-2	0.984		1	YCRCTy1-4	2559		1	YMRCTy1-4	2922		1	YLRWTy1-3	11490	5897	0.99		1	YJRWTy1-2	10980	5904	0.98
2	YLRWTy1-3	0.994		2	YORWTy1-2	0.983		2	YLRWTy1-3	2558		2	YJRWTy1-2	2394		2	YDRWTy1-5	11440	5895	0.99		2	YORWTy1-2	10930	5926	0.98
3	YCRCTy1-4	0.991		3	YMRCTy1-4	0.981		3	YDRWTy1-5	2259		3	YDRWTy1-4	2004		3	YCRCTy1-4	11310	5895	0.99		3	YMRCTy1-4	10790	5927	0.98
4	YGRCTy1-2	0.985		4	YGRCTy1-3	0.976		4	YDRCTy1-3	1795		4	YERCTy1-1	1877		4	YGRCTy1-2	11010	5895	0.98		4	YGRCTy1-3	10530	5927	0.97
5	YPRCTy1-2	0.983		5	YGRWTy1-1	0.975		5	YCRWTy1-3	1570		5	YCLWTy1-1	1877		5	YPRCTy1-2	10900	5896	0.98		5	YGRWTy1-1	10520	5908	0.97
6	YDRCTy1-1	0.982		6	YLRCTy1-4	0.973		6	YMRCTy1-4	1570		6	YMLWTy1-1	1877		6	YDRCTy1-1	10880	5895	0.98		6	YBRWTy1-2	10430	5930	0.97
7	YDRCTy1-2	0.979		7	YBRWTy1-2	0.973		7	YJRWTy1-2	1570		7	YOLWTy1-1	1877		7	YDRCTy1-2	10730	5895	0.98		7	YDRWTy1-4	10400	5927	0.97
8	YLRWTy1-2	0.978		8	YDRWTy1-4	0.973		8	YERCTy1-1	1472		8	YMLWTy1-2	1801		8	YLRWTy1-2	10690	5895	0.97		8	YLRCTy1-4	10400	5927	0.97
9	YJRWTy1-1	0.977		9	YPRWTy1-3	0.972		9	YLRCTy1-1	1472		9	YHRCTy1-1	1657		9	YERCTy1-1	10600	5901	0.97		9	YPRWTy1-3	10380	5930	0.97
10	YERCTy1-1	0.976		10	YMLWTy1-1	0.971		10	YPLWTy1-1	1472		10	YGRCTy1-3	1635		10	YJRWTy1-1	10590	5899	0.97		10	YMLWTy1-1	10310	5927	0.97
11	YPLWTy1-1	0.976		11	YERCTy1-1	0.967		11	YCRWTy1-5	1470		11	YCRWTy1-5	1635		11	YPLWTy1-1	10570	5901	0.97		11	YOLWTy1-1	10130	5907	0.96
12	YLRCTy1-1	0.975		12	YOLWTy1-1	0.966		12	YMLWTy1-2	1386		12	YLRCTy1-4	1629		12	YLRCTy1-1	10560	5901	0.97		12	YERCTy1-1	10130	5912	0.96
13	YCLWTy1-1	0.974		13	YCLWTy1-1	0.965		13	YJRWTy1-1	1386		13	YCRWTy1-2	1570		13	YMLWTy1-2	10550	5890	0.97		13	YMLWTy1-2	10100	5892	0.96
14	YMLWTy1-2	0.973		14	YCRWTy1-5	0.965		14	YLRWTy1-2	1386		14	YGRCTy1-2	1273		14	YCLWTy1-1	10480	5902	0.97		14	YPLWTy1-1	10070	5907	0.96
15	YARCTy1-1	0.969		15	YLRCTy1-1	0.965		15	YCLWTy1-1	1182		15	YDRCTy1-1	1273		15	YNLWTy1-2	10270	5896	0.96		15	YCRWTy1-5	10070	5918	0.96
16	YNLWTy1-2	0.969		16	YPLWTy1-1	0.965		16	YGRWTy1-1	1182		16	YERCTy1-2	1269		16	YARCTy1-1	10240	5903	0.97		16	YLRCTy1-1	10060	5907	0.96
17	YJRWTy1-2	0.967		17	YGRCTy1-2	0.963		17	YMLWTy1-1	1180		17	YORWTy1-2	1239		17	YOLWTy1-1	10180	5903	0.96		17	YCLWTy1-1	10040	5907	0.96
18	YOLWTy1-1	0.967		18	YMLWTy1-2	0.963		18	YOLWTy1-1	1180		18	YPRWTy1-3	1239		18	YJRWTy1-2	10130	5900	0.96		18	YERCTy1-2	9983	5727	0.97
19	YCRWTy1-5	0.964		19	YPRCTy1-4	0.963		19	YNLCTy1-1	1157		19	YNLCTy1-1	1157		19	YCRWTy1-5	10050	5904	0.96		19	YPRCTy1-4	9979	5908	0.96
20	YDRWTy1-4	0.961		20	YARCTy1-1	0.962		20	YORWTy2-2	1019		20	YPRCTy1-2	1101		20	YDRCTy1-3	9938	5085	0.99		20	YGRCTy1-2	9951	5923	0.96
21	YCRWTy1-3	0.96		21	YLRWTy1-3	0.961		21	YGRCTy1-3	958		21	YDRCTy1-2	1051		21	YDRWTy1-4	9858	5903	0.96		21	YARCTy1-1	9894	5909	0.96
22	YPRWTy1-3	0.96		22	YCRWTy1-2	0.96		22	YDRWTy1-4	958		22	YDRCTy1-3	975		22	YPRWTy1-3	9829	5906	0.96		22	YLRWTy1-3	9834	5915	0.96
23	YGRWTy1-1	0.959		23	YDRCTy1-1	0.96		23	YGRCTy1-2	958		23	YLRCTy1-1	958		23	YCRWTy1-3	9823	5901	0.96		23	YCRWTy1-2	9823	5901	0.96
24	YMLWTy1-1	0.959		24	YDRWTy1-5	0.959		24	YDRCTy1-1	958		24	YPLWTy1-1	958		24	YMLWTy1-1	9771	5903	0.96		24	YDRCTy1-1	9817	5923	0.96
25	YPRCTy1-4	0.956		25	YCRCTy1-4	0.958		25	YDRCTy1-2	958		25	YJRWTy1-1	958		25	YGRWTy1-1	9741	5904	0.95		25	YDRWTy1-5	9773	5904	0.96
26	YMRCTy1-4	0.954		26	YPRCTy1-2	0.958		26	YPRCTy1-4	945		26	YLRWTy1-2	958		26	YPRCTy1-4	9620	5903	0.95		26	YCRCTy1-4	9753	5903	0.95
27	YORWTy1-2	0.951		27	YDRCTy1-2	0.957		27	YARCTy1-1	830		27	YLRWTy1-3	958		27	YMRCTy1-4	9557	5903	0.95		27	YPRCTy1-2	9704	5905	0.95
28	YLRCTy1-4	0.945		28	YJRWTy1-1	0.955		28	YPRCTy1-2	830		28	YDRWTy1-5	958		28	YORWTy1-2	9430	5903	0.95		28	YDRCTy1-2	9690	5923	0.95
29	YGRCTy1-3	0.943		29	YLRWTy1-2	0.952		29	YLRCTy1-4	764		29	YARCTy1-1	854		29	YLRCTy1-4	9129	5903	0.94		29	YJRWTy1-1	9581	5907	0.95
30	YBRWTy1-2	0.941		30	YNLCTy1-1	0.949		30	YNLWTy1-2	754		30	YGRWTy1-1	853		30	YGRCTy1-3	9018	5903	0.94		30	YLRWTy1-2	9460	5903	0.95
31	YHRCTy1-1	0.932		31	YNLWTy1-2	0.945		31	YLRWTy2-1	753		31	YCRCTy1-4	802		31	YERCTy1-2	8974	5726	0.94		31	YNLCTy1-1	9275	5909	0.94
32	YNLCTy1-1	0.929		32	YHRCTy1-1	0.944		32	YORWTy1-2	749		32	YNLWTy1-2	754		32	YBRWTy1-2	8929	5906	0.94		32	YDRCTy1-3	9258	5081	0.98
33	YDRCTy1-3	0.923		33	YERCTy1-2	0.938		33	YHRCTy1-1	749		33	YPRCTy1-4	616		33	YNLCTy1-1	8298	5904	0.92		33	YNLWTy1-2	9111	5905	0.94
34	YBLWTy1-1	0.919		34	YMRCTy1-3	0.936		34	YPRWTy1-3	749		34	YBRWTy1-2	610		34	YHRCTy1-1	8284	5094	0.95		34	YHRCTy1-1	8883	5117	0.96
35	YMRCTy1-3	0.919		35	YBLWTy1-1	0.935		35	YDRCTy2-1	653		35	YBLWTy1-1	465		35	YMRCTy1-3	7874	5906	0.92		35	YBLWTy1-1	8671	5911	0.93
36	YERCTy1-2	0.917		36	YDRCTy1-3	0.905		36	YDRWTy2-2	650		36	YMRCTy1-3	375		36	YBLWTy1-1	7872	5908	0.92		36	YMRCTy1-3	8669	5911	0.93
37	YFLWTy2-1	0.772		37	YDRWTy2-3	0.751		37	YERCTy1-2	550		37	YLRCTy2-2	239		37	YORWTy2-2	2817	2153	0.91		37	YDRWTy2-3	1778	2140	0.85
38	YCLWTy2-1	0.771		38	YFLWTy2-1	0.749		38	YBRWTy1-2	524		38	YDRWTy2-3	110		38	YGRCTy2-1	2803	2154	0.91		38	YORWTy2-2	1572	2140	0.84
39	YDRCTy2-1	0.771		39	YCLWTy2-1	0.748		39	YORCTy2-1	524		39	YBLWTy2-1	74		39	YDRWTy2-2	2793	2157	0.91		39	YGRCTy2-1	1564	2140	0.84
40	YLRWTy2-1	0.771		40	YDRCTy2-1	0.748		40	YBLWTy2-1	491		40	YLRWTy2-1	68		40	YBLWTy2-1	2793	2157	0.91		40	YLRWTy2-1	1556	2140	0.84
41	YGRCTy2-1	0.77		41	YGRWTy2-2	0.748		41	YBLWTy1-1	465		41	YORWTy2-2	68		41	YLRWTy2-1	2779	2154	0.91		41	YFLWTy2-1	1556	2140	0.84
42	YGRWTy2-2	0.77		42	YLRWTy2-1	0.748		42	YGRCTy2-1	383		42	YGRCTy2-1	65		42	YCLWTy2-1	2771	2154	0.91		42	YBLWTy2-1	1556	2140	0.84
43	YDRWTy2-2	0.769		43	YGRCTy2-1	0.747		43	YNLCTy2-1	383		43	YCLWTy2-1	65		43	YFLWTy2-1	2769	2157	0.91		43	YGRWTy2-2	1548	2140	0.84
44	YBLWTy2-1	0.768		44	YBLWTy2-1	0.745		44	YCLWTy2-1	383		44	YGRWTy2-2	65		44	YDRCTy2-1	2753	2153	0.91		44	YCLWTy2-1	1548	2140	0.84
45	YORWTy2-2	0.768		45	YDRWTy2-2	0.745		45	YGRWTy2-2	383		45	YFLWTy2-1	65		45	YGRWTy2-2	2744	2144	0.91		45	YDRCTy2-1	1546	2143	0.84
46	YORCTy2-1	0.767		46	YORWTy2-2	0.745		46	YFLWTy2-1	383		46	YDRCTy2-1	65		46	YORCTy2-1	2656	2144	0.9		46	YDRWTy2-2	1524	2140	0.84
47	YDRWTy2-3	0.764		47	YORCTy2-1	0.743		47	YMRCTy1-3	359		47	YDRWTy2-2	56		47	YDRWTy2-3	2539	2153	0.89		47	YORCTy2-1	1499	2143	0.83
48	YLRCTy2-2	0.689		48	YLRCTy2-2	0.68		48	YDRWTy2-3	301		48	YORCTy2-1	56		48	YNLCTy2-1	2161	1826	0.89		48	YNLCTy2-1	1352	1826	0.84
49	YNLCTy2-1	0.666		49	YNLCTy2-1	0.65		49	YLRCTy2-2	213		49	YNLCTy2-1	44		49	YLRCTy2-2	1037	535	0.99		49	YLRCTy2-2	868	578	0.93

## Sheet: donorSort
		Rank vs YCRWTy1-2				Rank vs YCRWTy1-3
	overall	longest block	local		overall	longest block	local
	identity	of 100% identity	identity		identity	of 100% identity	identity
YARCTy1-1	15	27	16		20	29	21
YBLWTy1-1	34	41	36		35	35	35
YBLWTy2-1	44	40	40		44	39	42
YBRWTy1-2	30	38	32		7	34	6
YCLWTy1-1	13	15	14		13	5	17
YCLWTy2-1	38	44	42		39	43	44
YCRWTy1-2					22	13	23
YCRWTy1-3	21	5	23
YCRWTy1-4	3	1	3		25	31	26
YCRWTy1-5	19	11	19		14	11	15
YDRCTy1-1	6	24	6		23	15	24
YDRCTy1-2	7	25	7		27	21	28
YDRCTy1-3	33	4	20		36	22	32
YDRCTy2-1	39	35	44		40	46	45
YDRWTy1-4	20	22	21		8	3	7
YDRWTy1-5	1	3	2		24	28	25
YDRWTy2-2	43	36	39		45	47	46
YDRWTy2-3	47	48	47		37	38	37
YERCTy1-1	10	8	9		11	4	12
YERCTy1-2	36	37	31		33	16	18
YFLWTy2-1	37	46	43		38	45	41
YGRCTy1-2	4	23	4		17	14	20
YGRCTy1-3	29	21	30		4	10	4
YGRCTy2-1	41	42	38		43	42	39
YGRWTy1-1	23	16	25		5	30	5
YGRWTy2-2	42	45	45		41	44	43
YHRCTy1-1	31	33	34		32	9	34
YJRWTy1-1	9	13	10		28	25	29
YJRWTy1-2	17	7	18		1	2	1
YLRCTy1-1	12	9	12		15	23	16
YLRCTy1-4	28	29	29		6	12	8
YLRCTy2-2	48	49	49		48	37	49
YLRWTy1-2	8	14	8		29	26	30
YLRWTy1-3	2	2	1		21	27	22
YLRWTy2-1	40	31	41		42	40	40
YMLWTy1-1	24	17	24		10	6	10
YMLWTy1-2	14	12	13		18	8	13
YMRCTy1-3	35	47	35		34	36	36
YMRCTy1-4	26	6	27		3	1	3
YNLCTy1-1	32	19	33		30	19	31
YNLCTy2-1	49	43	48		49	49	48
YNLWTy1-2	16	30	15		31	32	33
YOLWTy1-1	18	18	17		12	7	11
YORCTy2-1	46	39	46		47	48	47
YORWTy1-2	27	32	28		2	17	2
YORWTy2-2	45	20	37		46	41	38
YPLWTy1-1	11	10	11		16	24	14
YPRCTy1-2	5	28	5		26	20	27
YPRCTy1-4	25	26	26		19	33	19
YPRWTy1-3	22	34	22		9	18	9
